# Supplementary material for: Bacterial Sensitivity To Chlorhexidine and Povidone-Iodine Antiseptics Over Time: A Systematic Review and Meta-Analysis of Human-Derived Data
Source: Research Square preprint supplement (doi:10.21203/rs.3.rs-1214575/v1), 2022-01-12
Supplement: Supplementary file 1 [file a74a83f9d3918318023db929.docx]

**S2 Table.** The number of experiments captured from the included studies, tabulated by the antiseptic studied and the family of the microbe

| **Family** | **Number of experiments** | |
| --- | --- | --- |
| **Chlorhexidine** | **Povidone iodine** |
| Acinetobacter | 6 | 0 |
| Actinomyces | 1 | 0 |
| Anaerobes | 10 | 1 |
| Enterococci | 19 | 2 |
| Enteriobacteriales | 24 | 13 |
| Pseudomonas | 12 | 3 |
| Pyogenes (Group A, β-haemolytic) Streptococci | 3 | 0 |
| Viridans (Group B, α-haemolytic) Streptococci | 22 | 0 |
| Coagulase Negative Staphylococci | 15 | 1 |
| Staphylococcus aureus (unspecified) | 3 | 0 |
| Staphylococcus aureus (MRSA) | 23 | 1 |
| Staphylococcus aureus (MSSA) | 13 | 2 |
